# Supplementary material for: Patterns of AllocationCSRPlant Functional Types in Northern Europe
Source: Hindawi journal article supplement (doi:10.1155/2016/1323614), 2016-01-01
Supplement: f1 [file 1323614.f1.xls]

## Sheet: Лист1
Species	Family	Strategy by Grime				Raw data												Transformed data											PCA		CSR			Strategy by model
		Name	C	S	R	CH	LDMC	FS	FP	LS	LDW	SLA	LA	PN	RD	LNC	LCC	CH_tr	LDMC_tr	FS_tr	FP_tr	LS_tr	LDW_tr	SLA_tr	PN_tr	RD_tr	LNC_tr	LCC_tr	PCA_1	PCA_2	C	S	R
Achillea millefolium L.	Asteraceae	CSR	0	0	0	395.361	18.6498	5	4	4	74.9712	23.4687	1749.5	12.6167	1.64207	27.2747	458.883	5.9798	4.31854	5	4	4	7.3171	4.84445	3.552	1.28143	5.22252	21.4216	-0.0456941	0.1132	0.111917	-0.0354069	-0.0977094	CSR
Aconitum septentrionale Koelle	Ranunculaceae	-				909.167	12.8861	4	3	5	1666.15	39.1056	53813.7	21.3947	2.50621	40.0636	429	6.81253	3.58972	4	3	5	10.4183	6.25345	4.62544	1.5831	6.32958	20.7123	1.3141	1.48174	1.51863	-1.9529	0.355992	C/CR
Alisma plantago-aquatica L.	Alismataceae	R/CR	-1	-2	1	685	16.3381	4	3	2	613.063	29.6878	16445.6	17.95	1.50153	37.7	433.5	6.52942	4.04204	4	3	2	9.41847	5.44865	4.23674	1.22537	6.14003	20.8207	0.676963	0.476479	0.495482	-0.826139	0.331986	CR/CSR
Amoria repens (L.) C. Presl	Fabaceae	CR/CSR	0	-1	0	263.167	23.1756	3	3	4	26.3	30.5436	796.56	15.9	2.605	38.75	439	5.57279	4.8141	3	3	4	6.26957	5.52663	3.98748	1.614	6.22495	20.9523	0.444897	0.182923	0.195412	-0.461263	0.285635	CSR
Angelica sylvestris L.	Apiaceae	C/CR	1	-2	-1	960.736	24.7453	4	2	3	1663.2	24.964	37190.7	7.3688	1.34365	28.4007	433.212	6.8677	4.97447	4	2	3	10.4165	4.9964	2.71455	1.15916	5.32923	20.8137	-0.484817	1.26806	1.25445	-0.417698	-1.07141	C/CSR
Antennaria dioica (L.) Gaertn.	Asteraceae	SR/CSR	-1	0	0	113.464	22.583	3	3	4	3.59125	20.9214	118.119	6.765	1.65997	17.4333	424	4.73149	4.75216	3	3	4	4.2785	4.57399	2.60096	1.2884	4.17532	20.5913	-0.897409	-1.58909	-1.61428	1.69567	0.0558909	S/SR
Arctium lappa L.	Asteraceae	C/CR	1	-2	-1	1227	16.1384	4	2	3	2417	30.738	73275.1	17.3722	4.23688	23.5	387.5	7.11233	4.01727	4	2	3	10.7903	5.54419	4.168	2.05837	4.84768	19.685	1.49098	0.99328	1.03513	-1.78432	0.760267	CR
Artemisia vulgaris L.	Asteraceae	C/CR	1	-2	-1	840.644	20.6714	4	4	3	122.173	36.8624	3938.52	12.3106	1.42956	33.075	415.5	6.73417	4.54658	4	4	3	7.80544	6.07144	3.50864	1.19564	5.75109	20.3838	0.531578	0.361599	0.376521	-0.640845	0.26719	CR/CSR
Astragalus frigidus (L.) A. Gray	Fabaceae	-				237.5	18.3403	4	2	4	38.2239	23.9575	744.574	16.7	3.435	53.3073	489.525	5.47017	4.28256	4	2	4	6.64346	4.89464	4.08656	1.85338	7.30118	22.1252	0.474232	0.747687	0.760998	-0.83833	0.018155	CR/CSR
Bartsia alpina L.	Scrophulariaceae	-				135.077	19.7573	4	3	4	10.4138	17.226	192.692	4.68	2.3	26.4733	493.733	4.90584	4.44492	4	3	4	5.34313	4.15043	2.16333	1.51658	5.14522	22.2201	-1.05132	-0.586599	-0.61611	1.18679	-0.59502	S/CSR
Bistorta vivipara (L.) Gray	Polygonaceae	-				196.22	21.5509	5	2	3	13.9583	20.3896	310.727	7.54	1.21	22.7667	467.5	5.27924	4.6423	5	2	3	5.63608	4.51548	2.74591	1.1	4.77144	21.6217	-1.27548	-0.794804	-0.830606	1.49198	-0.678826	S/CSR
Bromopsis inermis (Leyss.) Holub	Poaceae	C	2	-2	-2	653.867	31.9043	3	3	3	53.1833	19.2108	1068.08	15.97	2.43	26.8	454	6.4829	5.64839	3	3	3	6.97375	4.38301	3.99625	1.55885	5.17687	21.3073	0.00639866	0.789506	0.789685	-0.50016	-0.403513	C/CSR
Calamagrostis epigeios (L.) Roth	Poaceae	C/SC	1	-1	-2	1669.33	34.5191	4	2	3	93	21.9331	2024.87	14.3036	1.87149	18.4167	426	7.42018	5.8753	4	2	3	7.5326	4.68328	3.78201	1.36803	4.29146	20.6398	-0.28023	1.0973	1.08943	-0.469948	-0.808029	C/CSR
Caltha palustris L.	Ranunculaceae	CSR	0	0	0	424	11.7779	2	3	2	442.689	30.183	10126.2	2.85	1.45	42.0065	446.172	6.04973	3.43189	2	3	2	9.09287	5.49391	1.68819	1.20416	6.48124	21.1228	-0.131003	-0.0196634	-0.0233407	0.114372	-0.101823	CSR
Campanula rotundifolia L.	Campanulaceae	S/CSR	-1	1	-1	389.788	20.5151	3	4	2	4.78121	35.3065	153.88	4.72541	0.732513	19.7242	432.06	5.9656	4.52936	3	4	2	4.56469	5.94193	2.1738	0.85587	4.4412	20.7861	-0.873008	-1.42638	-1.45089	1.57462	-0.00753357	S/CSR
Capsella bursa-pastoris (L.) Medikus	Brassicaceae	R	-2	-2	2	326.679	13.7452	3	6	1	24.0264	37.8492	1269.1	51.1621	2.89874	35.6783	407.51	5.78898	3.70745	3	6	1	6.17915	6.15217	7.15277	1.70257	5.97313	20.1869	2.81649	-1.16307	-1.08401	-1.46432	3.01064	R
Centaurea jacea L.	Asteraceae	-				666.812	23.2961	4	4	3	28.4193	16.3992	850.83	22.52	2.11511	24.8105	459.934	6.50251	4.8266	4	4	3	6.34707	4.04959	4.74552	1.45434	4.98101	21.4461	0.447722	0.22975	0.242317	-0.492833	0.263793	CSR
Chamaenerion angustifolium (L.) Scop.	Onagraceae	C	2	-2	-2	1125.08	21.8056	5	2	5	104.678	26.4651	2135.89	2.99159	1.76728	30.25	431	7.02561	4.66964	5	2	5	7.65089	5.14443	1.72962	1.32939	5.5	20.7605	-0.556717	1.12768	1.11206	-0.273648	-1.06017	C/CSR
Comarum palustre L.	Rosaceae	-				363.889	27.956	3	4	6	315.356	23.9757	6221.92	23.2455	3.59571	27.339	442.996	5.89685	5.28734	3	4	6	8.7537	4.8965	4.82136	1.89624	5.22867	21.0475	0.778606	1.37173	1.39359	-1.46681	-0.04487	C/CSR
Cortusa matthioli L.	Primulaceae	-				227.429	13.0467	3	3	3	61	48.6631	2927.37	1.93	0.89	26.65	418.5	5.42684	3.61202	3	3	3	7.11087	6.9759	1.38924	0.943398	5.16236	20.4573	-0.812885	-1.1765	-1.19932	1.37106	-0.0855741	S/CSR
Crepis sibirica L.	Asteraceae	-				596.333	11.5265	5	2	2	235.417	49.6665	11684.7	20.9	2.73	42.7	409	6.3908	3.39507	5	2	2	8.46136	7.04745	4.57165	1.65227	6.53452	20.2237	1.47786	0.0660352	0.107519	-1.19254	1.22939	R/CSR
Dactylis glomerata L.	Poaceae	C/CSR	1	-1	-1	1207.81	28.368	4	3	4	98.9439	23.6322	2289.14	31.6468	2.09815	27.6602	435.886	7.09656	5.32616	4	3	4	7.59455	4.86129	5.62555	1.4485	5.2593	20.8779	0.781167	1.26562	1.28754	-1.40225	0.0122895	C/CSR
Deschampsia cespitosa (L.) P. Beauv.	Poaceae	SC/CSR	0	0	-1	809.809	36.2149	5	3	3	42.7635	20.2158	612.684	6.51959	1.12738	22.1231	445.828	6.6968	6.01788	5	3	3	6.75569	4.4962	2.55335	1.06178	4.70352	21.1146	-1.05573	0.624734	0.595099	0.430485	-1.22629	SC/CSR
Elytrigia repens (L.) Nevski	Poaceae	C/CR	1	-2	-1	648.419	38.2323	4	3	6	124.1	16.0882	1816.74	3.17921	1.36781	25.1024	474.603	6.47454	6.18323	4	3	6	7.82109	4.01101	1.78303	1.16953	5.01023	21.7854	-1.57439	1.74615	1.70195	0.131132	-2.25068	C/SC
Epilobium palustre L.	Onagraceae	S/CSR	-1	1	-1	465.297	18.7668	4	4	2	22.1346	33.9869	759.371	16.9837	3.07303	15.3425	417.8	6.14268	4.33207	4	4	2	6.09714	5.82983	4.12113	1.75301	3.91695	20.4402	0.745908	-0.946167	-0.925229	0.0124389	1.1279	R/CSR
Epipactis atrorubens (Hoffm.) Besser	Orchidaceae	S	-2	2	-2	389.286	21.8646	5	1	3	79.0571	25.622	1353.69	6.1	0.5	31.3333	447	5.96431	4.67596	5	1	3	7.37017	5.06182	2.46982	0.707107	5.59762	21.1424	-1.40484	-0.00174363	-0.0411778	1.09534	-1.20026	S/CSR
Erysimum cheiranthoides L.	Brassicaceae	R	-2	-2	2	490.381	22.4283	3	5	1	30.4669	25.1526	800.495	14.027	2.72891	35.25	404.5	6.19518	4.73585	3	5	1	6.41664	5.01523	3.74527	1.65194	5.93717	20.1122	1.3172	-0.519307	-0.482333	-0.700273	1.39524	R/CSR
Filipendula ulmaria (L.) Maxim.	Rosaceae	C/SC	1	-1	-2	879.892	29.8902	4	2	5	435.503	26.0446	9902.1	9.8825	1.205	24.6245	462.631	6.7798	5.46719	4	2	5	9.0765	5.10339	3.14364	1.09772	4.96231	21.5089	-1.00939	1.64657	1.61824	-0.246502	-1.71601	C/SC
Fragaria vesca L.	Rosaceae	S/CSR	-1	1	-1	141.335	30.3957	4	2	5	79.3085	35.8266	2757.1	3.72157	1.60626	20.3927	451.5	4.95113	5.51323	4	2	5	7.37335	5.98553	1.92914	1.26738	4.51583	21.2485	-1.65869	0.0648005	0.0182408	1.25133	-1.45178	S/CSR
Galeopsis speciosa Mill.	Lamiaceae	R/CR	-1	-2	1	527.25	19.8933	5	2	1	92.928	31.3271	2722.88	21.631	3.01806	29.8	428.5	6.26767	4.46019	5	2	1	7.53183	5.59706	4.65091	1.73726	5.45894	20.7002	0.855762	-0.110935	-0.0869134	-0.596982	0.789157	CR/CSR
Geranium richardsonii Fisch. & Trautv.	Geraniaceae	-				376.5	21.6226	4	2	2	121.083	41.0339	4755.35	10.95	1.93	37.1	425.5	5.93092	4.65001	4	2	2	7.79648	6.40577	3.30908	1.38924	6.09098	20.6277	0.109731	0.048964	0.0520442	-0.11618	0.068457	CSR
Geranium sylvaticum L.	Geraniaceae	CSR	0	0	0	565.154	20.7308	3	2	3	263.382	30.9809	8156.82	7.61667	2.59333	31.4253	450.459	6.3371	4.55311	3	2	3	8.57361	5.56605	2.75983	1.61038	5.60583	21.224	-0.120549	0.730546	0.727163	-0.3643	-0.481513	C/CSR
Geum rivale L.	Rosaceae	S/CSR	-1	1	-1	405.833	25.0078	4	2	3	262.199	22.6394	5452.73	9	0.78	28.7389	434	6.00594	5.00078	4	2	3	8.5691	4.75809	3	0.883176	5.36087	20.8327	-0.873465	0.294995	0.270476	0.49533	-0.899641	SC/CSR
Gymnadenia conopsea (L.) R. Br.	Orchidaceae	SR	-2	0	0	381.521	14.0057	4	2	3	73.3535	19.9068	1368.91	7.46	0.91	26.8	436	5.94417	3.74243	4	2	3	7.29529	4.4617	2.7313	0.953939	5.17687	20.8806	-0.64845	-0.571267	-0.589469	0.86338	-0.258504	S/CSR
Hedysarum arcticum B. Fedtsch.	Fabaceae	-				303.167	19.9921	5	1	3	133.944	19.6431	2607.62	5.995	3.335	46.325	459.5	5.71428	4.47125	5	1	3	7.89743	4.43206	2.44847	1.8262	6.80625	21.436	-0.0850397	0.699418	0.697031	-0.372435	-0.435026	C/CSR
Hypericum maculatum Crantz	Hypericaceae	CR/CSR	0	-1	0	330.205	29.2378	5	2	4	16.2416	26.1699	428.906	6.45	1.0167	30.3667	472.333	5.79971	5.4072	5	2	4	5.78758	5.11565	2.53969	1.00832	5.5106	21.7332	-1.41392	0.280175	0.240486	0.925589	-1.35406	SC/CSR
Lathyrus pratensis L.	Fabaceae	CSR	0	0	0	627.751	27.306	4	3	6	13.7332	29.358	381.776	18.315	2.34757	36.655	463.656	6.44214	5.22552	4	3	6	5.61981	5.4183	4.2796	1.53218	6.05434	21.5327	0.180489	1.24637	1.25144	-0.922304	-0.49133	C/CSR
Lathyrus vernus (L.) Bernh.	Fabaceae	-				322.166	20.3714	3	1	5	120.828	42.9981	4775.37	9.54	0.61	40.6333	446	5.77507	4.51347	3	1	5	7.79437	6.55729	3.08869	0.781025	6.37443	21.1187	-0.997971	0.598586	0.570573	0.401897	-1.16336	SC/CSR
Leontodon autumnalis L.	Asteraceae	R/CSR	-1	-1	1	244.037	16.8367	5	5	3	26.8481	27.2832	684.913	19.1307	2.64849	21.0038	433.714	5.49732	4.10325	5	5	3	6.29019	5.22333	4.37386	1.62742	4.58299	20.8258	0.806397	-0.954157	-0.931521	-0.0296648	1.18376	R/CSR
Lepidotheca suaveolens (Pursh) Nutt.	Asteraceae	R	-2	-2	2	318.333	15.1011	3	4	1	8.13333	38.7904	316.215	21.1494	3.59017	32.25	420.5	5.7631	3.88602	3	4	1	5.09597	6.2282	4.59885	1.89478	5.67891	20.5061	1.54153	-1.22285	-1.17958	-0.433741	1.9515	R/CSR
Leucanthemum vulgare Lam.	Asteraceae	CR/CSR	0	-1	0	474.079	16.9171	5	2	2	30.4762	21.3467	640.745	23.5967	2.18228	22.1751	426.219	6.16137	4.11304	5	2	2	6.41694	4.62025	4.85764	1.47726	4.70904	20.6451	0.506641	-0.658526	-0.644304	0.0183988	0.774319	SR/CSR
Maianthemum bifolium (L.) F.W. Schmidt	Convallariaceae	-				98.4128	18.2804	3	2	5	404.487	43.1605	1546.63	9.58	1.24	28.875	421	4.58917	4.27556	3	2	5	9.00262	6.56966	3.09516	1.11355	5.37355	20.5183	-0.677525	-0.302951	-0.321969	0.71774	-0.422358	CSR
Melampyrum pratense L.	Scrophulariaceae	R/SR	-2	-1	1	244.84	19.7146	4	4	1	12.3051	31.6261	396.97	17.5897	3.07039	34.8	453	5.50061	4.44012	4	4	1	5.51001	5.62371	4.194	1.75225	5.89915	21.2838	0.832978	-0.831491	-0.80811	-0.127305	1.14294	R/CSR
Melica nutans L.	Poaceae	S/SC	-1	1	-2	493.879	31.3842	3	3	2	12.9856	37.506	487.974	0.85	0.74	27.0367	459.75	6.20229	5.60216	3	3	2	5.56384	6.12421	0.921954	0.860233	5.19968	21.4418	-1.74039	-0.198677	-0.24753	1.48022	-1.38514	S/CSR
Myosotis arvensis (L.) Hill	Boraginaceae	R	-2	-2	2	296.096	12.9395	3	3	2	19.328	41.3026	535.412	17.2241	3.06166	24.5	406.5	5.69068	3.59715	3	3	2	5.96156	6.42671	4.15019	1.74976	4.94975	20.1618	1.02625	-1.28896	-1.26015	0.00907772	1.54517	R/CSR
Oxalis acetosella L.	Oxalidaceae	S/SR	-1	1	-2	63.7167	13.3456	3	2	4	9.83676	62.5938	678.433	14.7	0.7	25.9969	427.833	4.15445	3.65316	3	2	4	5.28613	7.91163	3.83406	0.83666	5.09871	20.6841	-0.771557	-1.96454	-1.9862	1.83313	0.357987	S/SR
Paeonia anomala L.	Paeoniaceae	-				874.333	16.8521	4	2	3	870.917	27.835	23819.9	5.06	0.55	24	458.5	6.77346	4.10513	4	2	3	9.76955	5.27589	2.24944	0.74162	4.89898	21.4126	-1.18851	0.592245	0.558883	0.554285	-1.32299	SC/CSR
Paris quadrifolia L.	Trilliaceae	SR/CSR	-1	0	0	171.864	14.8218	4	3	2	33.2503	52.9403	2111.63	4.735	0.31	32.5	427	5.1467	3.84991	4	3	2	6.50406	7.27601	2.17601	0.556776	5.70088	20.664	-0.972865	-1.50153	-1.52883	1.69953	-0.0539872	S/SR
Pimpinella saxifraga L.	Apiaceae	SR/CSR	-1	0	0	493.286	30.289	4	3	3	139.95	16.3145	2273.29	4.3	2.27532	22.4	445.5	6.20109	5.50354	4	3	3	7.94129	4.03913	2.07364	1.50842	4.73286	21.1069	-0.712018	0.534663	0.514676	0.219258	-0.885755	SC/CSR
Pinguicula vulgaris L.	Lentibulariaceae	SR	-2	0	0	77.7727	8.1264	5	1	2	4.18569	46.6076	156.162	3.715	1.31	14.2052	431.784	4.35379	2.85068	5	1	2	4.43167	6.82698	1.92743	1.14455	3.76899	20.7794	-1.32298	-3.03778	-3.07492	2.93577	0.442482	S/SR
Plantago major L.	Plantaginaceae	R/CSR	-1	-1	1	314.708	14.2822	3	2	2	153.733	26.0269	6575.58	14.0463	1.65562	22.4667	407.167	5.75165	3.77918	3	2	2	8.03522	5.10166	3.74783	1.28671	4.7399	20.1784	0.160609	-0.897653	-0.893145	0.437905	0.60233	SR/CSR
Plantago media L.	Plantaginaceae	S/CSR	-1	1	-1	341.077	18.3007	3	5	2	204.045	22.5518	4052.52	6.8525	0.845	18.3	394	5.83211	4.27793	3	5	2	8.31834	4.74887	2.61773	0.919239	4.27785	19.8494	-0.089008	-1.10999	-1.11249	0.765512	0.4989	SR/CSR
Poa annua L.	Poaceae	R	-2	-2	2	171.25	24.0229	3	5	1	2.42218	37.6356	173.004	26.4748	0.72243	44.4814	424.39	5.14312	4.90132	3	5	1	3.88467	6.13479	5.14537	0.849959	6.66944	20.6007	0.679432	-1.52971	-1.51064	0.430215	1.37335	SR
Polygonum aviculare L.	Polygonaceae	R	-2	-2	2	467.667	22.2301	4	4	6	11.2413	28.2535	322.8	6.40744	4.31872	40.45	410.5	6.14776	4.71488	4	4	6	5.41959	5.3154	2.53129	2.07815	6.36003	20.2608	0.995698	0.64663	0.674579	-1.18112	0.516367	CR/CSR
Pyrola rotundifolia L.	Ericaceae	S	-2	2	-2	143.429	28.6989	4	2	3	76.7621	17.784	1258.56	5.09489	0.565222	15.5	482	4.96584	5.35714	4	2	3	7.34071	4.21711	2.25719	0.751813	3.937	21.9545	-2.36293	-0.574161	-0.640489	2.20062	-1.72291	S/SC
Ranunculus propinquus C.A. Mey.	Ranunculaceae	-				389.333	16.8208	4	1	2	16.4333	45.3542	741.54	15.6667	1.88	26.45	399.5	5.96444	4.10132	4	1	2	5.79931	6.73455	3.95811	1.37113	5.14296	19.9875	0.236214	-0.985299	-0.978668	0.433988	0.712376	SR/CSR
Ranunculus repens L.	Ranunculaceae	CR	0	-2	0	373.762	17.0948	4	1	6	91.1223	33.0724	3064.69	23.6	2.68	26.5318	425.318	5.92362	4.13458	4	1	6	7.5122	5.75086	4.85798	1.63707	5.1509	20.6232	0.38399	0.548893	0.559672	-0.643357	0.043977	CR/CSR
Rhodiola rosea L.	Crassulaceae	-				187	8.42352	4	2	3	4.96168	35.3283	152.346	29.8333	2.92933	32.7931	446.536	5.23111	2.90233	4	2	3	4.60174	5.94376	5.46199	1.71153	5.72653	21.1314	1.07763	-1.3746	-1.34435	0.0227707	1.63346	R/CSR
Rubus chamaemorus L.	Rosaceae	SC/CSR	0	0	-1	127.264	31.7496	4	2	6	169.381	15.0069	2348.84	10	1.35983	27.2578	481.96	4.84626	5.63468	4	2	6	8.13215	3.87388	3.16228	1.16612	5.2209	21.9536	-1.53938	0.826274	0.783063	0.680803	-1.74423	SC
Sanguisorba officinalis L.	Rosaceae	C/CSR	1	-1	-1	580.927	28.0807	4	2	3	69.9143	24.4324	1895.92	3.48	1.29	25.4833	426.5	6.36463	5.29913	4	2	3	7.24727	4.94292	1.86548	1.13578	5.0481	20.6519	-1.00947	0.264007	0.235671	0.620699	-0.999873	SC/CSR
Saussurea alpina (L.) DC.	Asteraceae	-				158.427	18.3602	5	1	3	39.1895	17.7481	660.278	7.2	1.1	21.0238	394.975	5.06529	4.28488	5	1	3	6.66841	4.21286	2.68328	1.04881	4.58517	19.874	-0.868012	-1.3527	-1.37706	1.52451	-0.0414336	S/CSR
Stellaria media (L.) Vill.	Caryophyllaceae	R	-2	-2	2	308.136	9.59979	3	4	5	8.21741	54.4372	437.422	44.6033	3.05424	31.8	393	5.73054	3.09835	3	4	5	5.10626	7.37815	6.67857	1.74764	5.63915	19.8242	2.34558	-0.906904	-0.841063	-1.25818	2.4753	R
Tanacetum bipinnatum (L.) Sch. Bip.	Asteraceae	-				317.5	15.4727	4	3	5	143	29.8777	4149.01	17.25	2.07	24.225	434.5	5.76048	3.93354	4	3	5	7.96284	5.46605	4.15331	1.43875	4.92189	20.8447	0.269622	0.0594554	0.0670238	-0.247301	0.199732	CSR
Tanacetum vulgare L.	Asteraceae	C/CSR	1	-1	-1	580.803	21.6833	4	4	4	239.049	22.7788	4633.22	9.09	2.60297	26.6252	449.728	6.36441	4.65653	4	4	4	8.47667	4.77271	3.01496	1.61337	5.15996	21.2068	0.182621	0.762396	0.767522	-0.620418	-0.238796	C/CSR
Taraxacum officinale F.H. Wigg.	Asteraceae	R/CSR	-1	-1	1	403.833	13.7227	3	2	3	491.404	29.8962	9505.65	18.0429	1.72821	27.75	408	6.001	3.70442	3	2	3	9.19727	5.46774	4.2477	1.31461	5.26783	20.199	0.518858	-0.136974	-0.12241	-0.318233	0.514588	CSR
Thalictrum simplex L.	Ranunculaceae	-				550	26.0643	4	3	3	22.05	22.6757	500	3.08	1.72771	32.65	463	6.30992	5.10532	4	3	3	6.09331	4.7619	1.75499	1.31442	5.71402	21.5174	-0.798016	0.333931	0.311531	0.41214	-0.855301	SC/CSR
Trientalis europaea L.	Primulaceae	S/CSR	-1	1	-1	128.823	16.8325	4	2	3	11.4065	52.3827	524.295	17.34	3.55	26.2633	444.052	4.85844	4.10275	4	2	3	5.43418	7.23759	4.16413	1.88414	5.12477	21.0725	0.314548	-1.05367	-1.04484	0.415852	0.81477	SR/CSR
Trifolium medium L.	Fabaceae	SC/CSR	0	0	-1	318.75	26.3	3	2	2	65.7402	17.7489	2299.5	16.5075	2.69857	34.4	449	5.76441	5.12835	3	2	2	7.18571	4.21294	4.06294	1.64273	5.86515	21.1896	0.166474	0.2229	0.227573	-0.26947	0.0268701	CSR
Tripleurospermum perforatum (Merat) M. Lainz	Asteraceae	R	-2	-2	2	576.333	18.3195	4	4	2	38.3667	21.1403	780.33	23.0009	2.36796	16.5	417.5	6.35669	4.28013	4	4	2	6.64719	4.59786	4.79593	1.53882	4.06202	20.4328	0.85155	-0.745057	-0.721154	-0.195982	1.11405	R/CSR
Trollius europaeus L.	Ranunculaceae	SC/CSR	0	0	-1	442.5	16.9229	3	3	2	210.794	34.5164	5540.03	19.5342	1.965	30.8906	416.989	6.09244	4.11375	3	3	2	8.35088	5.87507	4.41975	1.40178	5.55793	20.4203	0.793266	-0.188345	-0.166078	-0.499752	0.775822	CSR
Urtica dioica L.	Urticaceae	C	2	-2	-2	1161.93	26.3756	4	2	5	149.119	26.3572	3522.32	23.3493	1.87345	35.8259	377	7.05784	5.13572	4	2	5	8.00474	5.13393	4.83211	1.36874	5.98548	19.4165	1.00094	1.26688	1.29497	-1.57422	0.199546	C/CR
Valeriana wolgensis Kazak.	Valerianaceae	CSR	0	0	0	790.333	15.9991	4	2	3	102.75	32.906	3321.84	15.375	2.235	29.425	437.5	6.67245	3.99988	4	2	3	7.6323	5.73638	3.9211	1.49499	5.42448	20.9165	0.413972	0.334271	0.345891	-0.5321	0.180792	CR/CSR
Veronica longifolia L.	Scrophulariaceae	-				635.333	25.0933	3	4	5	60.1426	25.5303	1477.53	15.9102	1.90922	31.4992	454.667	6.45415	5.00932	3	4	5	7.09672	5.05275	3.98876	1.38175	5.61241	21.3229	0.209813	0.976106	0.981996	-0.775636	-0.326254	C/CSR
Vicia cracca L.	Fabaceae	C/CSR	1	-1	-1	617.517	26.8415	3	3	6	42.2169	25.0839	1526.77	20.735	1.735	39.3723	461.824	6.42571	5.18088	3	3	6	6.74282	5.00838	4.55357	1.31719	6.27474	21.4901	0.144028	1.44417	1.44821	-1.01796	-0.62497	C/CSR
Vicia sepium L.	Fabaceae	C/CSR	1	-1	-1	557.306	23.1575	3	3	6	43.1189	33.2181	1709.91	28.5085	3.42102	42.45	431.5	6.32311	4.81222	3	3	6	6.76396	5.76351	5.33933	1.8496	6.51537	20.7726	1.33897	1.30798	1.34556	-1.86329	0.467276	CR
Vicia sylvatica L.	Fabaceae	C/CSR	1	-1	-1	1101	20.8	3	3	6	35.1232	25.6	2031	17.25	1.83	33.65	502.3	7.00397	4.5607	3	3	6	6.55886	5.05964	4.15331	1.35277	5.80086	22.4121	-0.138786	1.60728	1.60338	-0.899977	-0.951274	C/CSR
